# Supplementary material for: The impact of tumor receptor heterogeneity on the response to anti-angiogenic cancer treatment
Source: Royal Society of Chemistry journal article supplement (doi:10.1039/c8ib00019k), 2018-04-01
Supplement: c8ib00019k1.zip [file c8ib00019k1.zip]

**Supplementary File S1.**

**Implementation of the Model**

We used BioNetGen1, a rule-based approach, to generate the model, which provides great help in models that involve dynamic assembly of multi-protein complexes. Our model is a whole-body model incorporating VEGF transport and kinetics, as well as the transport and kinetics of TSP1. We included all the significant species, which are shown in Fig. 1. The seed species and reaction rules are defined in BioNetGen, the rule-based modeling framework. These defined 86 seed species (29 in normal, 28 in blood, and 29 in tumor) participate in 452 reaction rules (129 in normal, 184 in blood, and 139 in tumor). Because of the numerous multi-species complexes, the 452 reaction rules and 86 seed species produce a total of 561 species and 2618 reactions. It is worth noting that this large number of species is due to the formation of complexes of species and the propagation of the reactions, of which some are highly similar and do not affect the soundness of the model. In the end, the BioNetGen will produce the MATLAB (The MathWorks, Natick, MA, USA) file needed to simulate the reaction network, which is a model that comprised of 561 non-linear ordinary differential equations (ODEs) predicting the species’ concentrations over time. The MATLAB model file is provided in Supplementary Files S2.

**Model parameters: numerical values and definitions.**

| **Parameter** | **Description** | **Unit** | **Model Value** | **Reference and Notes** | |
| --- | --- | --- | --- | --- | --- |
| **Geometric Parameters** | | | | | |
| Stefanini et al. constructed the first whole body compartmental body of the VEGF system and described the derivations of following geometric parameters in their work2. They later published another modeling work3, which provides a more detailed supplementary table describing the model geometric parameters with experimental measurements. Here we report the value and the sources of parameters used in the model file provided by us. | | | | | |
| BW | Patient Body weight | kg | 70 |  |  |
| Avogadro | Avogadro constant | mol-1 | 6.02e+23 |  |  |
| ECM_conc | Binding site density of extracellular matrix | M | 7.5e-7 | 4 | * The binding site density of VEGF and TSP1 are assumed to be the same as FGF. |
| EBM_conc | Binding site density of the basement membrane surrounding the endothelial cells | 1.3e-5 | 5 |
| PBM_conc | Binding site density of the basement membrane surrounding the parenchymall cells | 1.3e-5 |
| ECM_Vol_tis_norm | Volume of extracellular matrix of which available to soluble species in normal tissue | cm3/cm3 tissue | 0.061987 | 2,3 | * The present work models a breast cancer patient of same characteristics as in previous works, which provide the derivation of these geometric parameters and sources of experimental measurements. |
| EBM_Vol_tis_norm | Volume of microvessel basement membrane of which available to soluble species in normal tissue | 8.7e-5 |
| PBM_Vol_tis_norm | Volume of tissue cells basement membrane of which available to soluble species in normal tissue | 3.07e-4 |
| ECM_Vol_tis_blood | Volume of fluid space in blood of which available to soluble species | cm3/cm3 tissue | 0.51931 |
| EBM_Vol_tis_blood | Volume of luminal tumor endothelial cells basement membrane of which available to soluble species | 4.3e-4 |
| PBM_Vol_tis_blood | Volume of luminal healthy endothelial cells basement membrane of which available to soluble species | 0.00421 |
| ECM_Vol_tis_dis | Volume of extracellular matrix of which available to soluble species in breast tumor | cm3/cm3 tissue | 0.51931 |
| EBM_Vol_tis_dis | Volume of microvessel basement membrane of which available to soluble species in breast tumor | 0.00027 |
| PBM_Vol_tis_dis | Volume of tumor cells basement membrane of which available to soluble species in breast tumor | 0.002446 |
| vol_Norm | Total volume of normal tissue | cm3 | 61321 | 6 |  |
| vol_Blood | Total volume of blood tissue | 5000 |  |
| vol_Tumor | Total volume of tumor tissue | 33.51032 |  |
| vol_Subc | Total volume of subcutaneous compartment | 30 |  |  |
| tumorSA_Vol_tis_dis | Total tumor cells surface area in tumor tissue | cm2/cm3 tissue | 1534 | 7 |  |
| VesselSA_Vol_tis_dis | Total microvessels surface area in tumor tissue | 105 | 8 |  |
| VesselSA_Vol_tis_norm | Total microvessels surface area in normal tissue | 108 | 8 |  |
| fiberSA_Vol_tis_norm | Total tissue cells surface in normal tissue | 664 |  |
| tumorCellSurfArea_tis_dis | Surface area of one cancer cell | cm2 | 9.97e-6 | 7 |  |
| VesselCellSurfArea_blood | Surface are of the luminal side of an endotheali cell (blood) | 1.00e-5 |  |
| VesselCellSurfArea_tis_dis | Surface are of the abluminal side of an endotheali cell in tumor tissue | 1.00e-5 |  |
| VesselCellSurfArea_tis_norm | Surface are of an abluminal side of an endotheali cell in normal tissue | 1.00e-5 |  |
| fiberCellSurfArea_tis_norm | Surface area of skeletal muscle nuclear domain | 1.85e-5 | 8 |  |
| **Secretion Rates** | | | | | |
| The secretion rates of TSP1, MMP3, and proMMP9 are fitted in our study to match the experimental measurements9–12 as mentioned in Method section. The secretion rates of VEGF were fitted to in vivo population PK data in our previous modeling work13. The synthesis rates of a2M were introduced to whole body model in another previous modeling work of us14. | | | | | |
| qTSP1EC | TSP1 secretion rate of endothelial cell in normal tissue (luminal side) | molecules/cell/s | 1 |  | * The secretion rates of TSP1, MMP3 and proMMP9 for tumor cell and endothelial cells in tumor are based on previous TSP1-VEGF breast tumor tissue model and are further tuned to match the experimental data as mentioned in Methods part.  *Due to the scarcity of data, we assume the endothelial cells in tumor tissue and in normal tissue have same secretion property. |
| qTSP1disEC | TSP1 secretion rate of endothelial cell in tumor tissue (abluminal side) | 1 |
| qTSP1tum | TSP1 secretion rate of tumor cell | 1 |  |
| qTSP1myo | TSP1 secretion rate of a tissue cell in normal tissue | 0 |  |
| qMMP3_disEC | MMP3 secretion rate of endothelial cell in tumor tissue | 5 |  |
| qproMMP9_disEC | proMMP9 secretion rate of endothelial cell in tumor tissue | 1.2 |  |
| qMMP3_EC | MMP3 secretion rate of endothelial cell in normal tissue | 5 |  |
| qproMMP9_EC | proMMP9 secretion rate of endothelial cell in normal tissue | 1.2 |  |
| qMMP3_tum | MMP3 secretion rate of tumor cell | 12 |
| qproMMP9_tum | proMMP9 secretion rate of tumor cell | 24 |
| qMMP3_myo | MMP3 secretion rate of a tissue cell in normal tissue | 4 |
| qproMMP9_myo | proMMP9 secretion rate of a tissue cell in normal tissue | 4 |
| qV165_tumor | VEGF165 secretion rate of tumor cell | 0.387 | 13 | * The tumor secretion rates were estimated 15 with experimental measurements 16–19 . The ratio of tumor secreted VEGF165 to VEGF121 is set to be 1:1.  * The ratio of tumor endothelial cell secreated VEGF165 to VEGF121 is set to 9:1 20. The normal endothelial cell is assumed to have same secretion rate as tumor endothelial cell. The ratio of normal cell secreted VEGF165 to VEGF121 is set to 92:8 21,22. |
| qV121_tumor | VEGF121 secretion rate of tumor cell | 0.387 |
| qV165_disEC | VEGF165 secretion rate of endothelial cell in tumor compartment | 0.0324 |
| qV121_disEC | VEGF121 secretion rate of endothelial cell in tumor compartment | 0.0324*10/90 |
| qV165_myo | VEGF165 secretion rate of tissue cell in normal tissue | 5.01e-9 |
| qV121_myo | VEGF121 secretion rate of tissue cell in normal tissue | 5.01e-9*8/92 |
| ksyn_a2M | a2M secretion rate in blood | (mol/cm3 tissue)-1s-1 | 6.27e-14 | 6 |  |
| ksyn_a2M_fast | a2M_ fast secretion rate in blood | 3.14e-14 |  |
| **Recycling of the receptors** | | | | | |
| The recycling rates of receptors are originally from the first tumor tissue model of VEGF-Receptor System by Gabhann et al7. | | | | | |
| sR_receptors | Recycling rate of unbound receptors | s-1 | 0.00028 | 7 | *We assume all receptors have same internalization and recycling rates. |
| k_int_receptors | Internalization rate of all ligated and unbound receptors | 0.00028 |
| **Kinetic Parameters** | | | | | |
| Gabhann et al applied following kinetic rates of VEGF system in their work of tumor tissue model7 and illustrated the conversion from in vitro parameters to tissue parameters basing on geometric parameters. Following reported values are in vitro parameters, which are converted to tissue parameters used by model during the generation of the MATLAB model file. The kinetic parameters are from our previous tumor tissue model of VEGF and TSP123. | | | | | |
| kon_TSP1_GAG | TSP1 binding to glycosaminoglycan | M-1s-1 | 5.00e+5 | 23 | *The kinetic paramters of TSP1-receptor system are estimated in our previous tumor tissue model of VEGF and TSP1, which included detailed derivations. |
| kon_TSP1_CD36 | TSP1 binding to CD36 | 5.00e+5 |
| kon_TSP1_CD47 | TSP1 binding to CD47 | 5.00e+5 |
| kon_TSP1_LRP1 | TSP1 binding to LRP1 | 2.10e+5 |
| kon_TSP1_B1 | TSP1 binding to β1 integrin | 5.00e+5 |
| kon_TSP1_VEGF | TSP1 binding to VEGF | 5.00e+5 |
| kon_TSP1_MMP3 | TSP1 binding to MMP3 | 1.00e+5 |
| kon_V165_N1 | VEGF165 binding to Neuropilin-1 | 3.20e+6 | 24,25 |  |
| kon_V165_N2 | VEGF165 binding to Neuropilin-2 | 1.00e+6 | 26–28 | *~3-50 fold less tight than VEGF165-NRP1 |
| kon_V165_R1 | VEGF165 binding to VEGFR1 | 3.00e+7 | 29 |  |
| kon_V165_R2 | VEGF165 binding to VEGFR2 | 1.00e+7 | 30,31 |  |
| kon_V165_GAG | VEGF165 binding to glycosaminoglycan | 8600 | 32–34 |  |
| kon_V121_R1 | VEGF121 binding to VEGFR1 | 3.00e+7 | 13 | *Set to the same as V165- VEGR receptor |
| kon_V121_R2 | VEGF121 binding to VEGFR2 | 1.00e+7 |
| kon_MMP9_LRP1 | MMP9 binding to LRP1 | 9245 | 23 |  |
| kon_MMP3_proMMP9 | MMP3 binding to proMMP9 | 10000 |  |
| kon_VEGF_a2M | VEGF binding to alpha-2-macroglobulin | 25 | 20,35 |  |
| kon_VEGF_a2M_fast | VEGF fast binding to alpha-2-macroglobulin | 250 |  |
| koff_TSP1_GAG | TSP1 binding to glycosaminoglycan | s-1 | 0.1 | 23,36,37 |  |
| koff_TSP1_CD36 | TSP1 binding to CD36 | 0.115 |  |
| koff_TSP1_CD47 | TSP1 binding to CD47 | 0.005 |  |
| koff_TSP1_LRP1 | TSP1 binding to LRP1 | 0.0025 |  |
| koff_TSP1_B1 | TSP1 binding to β1 integrin | 0.05 |  |
| koff_TSP1_VEGF | TSP1 binding to VEGF | 0.005 |  |
| koff_TSP1_MMP3 | TSP1 binding to MMP3 | 0.0022303 |  |
| koff_V165_N1 | VEGF165 binding to Neuropilin-1 | 0.001 | 24,25 |  |
| koff_V165_N2 | VEGF165 binding to Neuropilin-2 | 0.001 | 26–28 |  |
| koff_V165_R1 | VEGF165 binding to VEGFR1 | 0.001 | 29 |  |
| koff_V165_R2 | VEGF165 binding to VEGFR2 | 0.001 | 30,31 |  |
| koff_V165_GAG | VEGF165 binding to glycosaminoglycan | 0.00069 | 32–34 |  |
| koff_V121_R1 | VEGF121 binding to VEGFR1 | 0.001 | 13 |  |
| koff_V121_R2 | VEGF121 binding to VEGFR2 | 0.001 |  |
| koff_MMP9_LRP1 | MMP9 binding to LRP1 | 0.00049 | 23 |  |
| koff_MMP3_proMMP9 | MMP3 binding to proMMP9 | 0.001 |  |
| koff_VEGF_a2M | VEGF binding to alpha-2-macroglobulin | 1.0e-4 | 20,35 |  |
| koff_VEGF_a2M_fast | VEGF fast binding to alpha-2-macroglobulin | 1.0e-4 |  |
| kc_V165N_R2 | Coupling of VEGFR2 and Neuropilin | (mol/cm2)-1s-1 | 1.00e+14 | 38,39 | *Estimated in 38 using data from 39. |
| kc_V165R2_N | Coupling of VEGFR2 and Neuropilin | 3.10e+13 |
| kc_R1_N | Coupling of VEGFR1 and Neuropilin | 1.00e+14 | 13 | *Set to the same as R2-N receptor |
| kc_CD36_R2 | Coupling of CD36 and VEGFR2 | 3.10e+11 | 23 |  |
| kc_CD36_B1 | Coupling of CD36 and  β1 integrin | 3.10e+13 |  |
| kc_CD47_R2 | Coupling of CD47 and VEGFR2 | 3.10e+11 |  |
| kdissoc_R2_N | Coupling of VEGFR2 and Neuropilin | s-1 | 0.001 | 38,39 |  |
| kdissoc_R1_N | Coupling of VEGFR2 and Neuropilin | 0.01 | 13 | *Assumed to be slower dissociation than R2-N. |
| kdissoc_CD36_B1 | Coupling of VEGFR1 and Neuropilin | 0.001 | 23 |  |
| kdissoc_CD36_R2 | Coupling of CD36 and VEGFR2 | 0.001 |  |
| kdissoc_CD47_R2 | Coupling of CD36 and  β1 integrin | 0.001 |  |
| **Degradation and Clearance Rates** | | | | | |
| The degradation rates and clearance rates are estimated by conversion from reported half-life time in literatures. The cleavage rate of TSP1 are fitted to match experimental data in our previous work23. The catalytic rate of the activation of proMMP9 by MMP3 and the cleavage of VEGF165 by MMP were previously reported in modeling works by Vempati36,37. | | | | | |
| kdeg_aV | Degradation rate of bevacizumab | s-1 | 4.415e-8 |  |  |
| kdeg_VEGF | Degradation rate of VEGF | 1.93e-4 | 40 |  |
| kdeg_TSP1 | Degradation rate of TSP1 | 3.3e-4 | 23 |  |
| kdeg_MMP | Degradation rate of MMP | 0.0012 |  |
| kdeg_TSP1mim | Degradation rate of ABT-510 | 1.60e-4 | 41 | *Assumed to be same as clearance rate. |
| c_aV | Clearance rate of bevacizumab in blood | 3.82e-7 | 42 | *According to FDA label, Bevacizumab has a 21 days half-life. |
| c_aV_VEGF | Clearance rate of VEGF-bound bevacizumab in blood | 3.82e-7 | 42 | *Assumed to be same as free Bevacizumab. |
| c_VEGF | Clearance rate of bevacizumab in blood | 0.0010797 | 43 |  |
| c_TSP1 | Clearance rate of TSP1 in blood | 0.00033 | 23 | * Assumed to be same as degradation rates. |
| c_MMP | Clearance rate of MMP in blood | 0.0012 |  |
| c_TSP1mim | Clearance rate of ABT-510 in blood | 1.60e-4 | 41 | *According to the reported 1.2 hours half-life in circulation of human body. |
| c_a2M | Clearance rate of alpha-2-macroglobulin in blood | 3.85e-5 | 6 |  |
| c_a2M_fast | Clearance rate of alpha-2-macroglobulin fast-binding in blood | 3.85e-3 |  |
| k_TSP1cleave | The cleavage rate of TSP1 through proteolysis | s-1 | 0.00386 | 23,36,37 |  |
| k_act_MMP3_proMMP9 | A Michaelis-Menten Activation constant of the activation of MMP9 by MMP3 | s-1 | 0.0019 |  |
| kp_mmp | The proteolysis rate of VEGF by MMPs | (mol/l)-1s-1 | 631 |  |
| **Receptor Numbers** | | | | | |
| The density of VEGF receptors and co-receptors on endothelial and tumor cells are systematically reported in our previous work15, which are taken from in vitro and in vivo measurements using quantitative flow cytometry44. Currently, there is a paucity of quantitative data for the number of TSP1 receptors on endothelial and tumor cells. Thus, we used the reported qualitative data in Human Protein Atlas to estimate the values as mentioned in Method Section. The numbers of receptors on the endothelial cell are set to be half of that for parenchymal cells (tumor cells or muscle fibre cells), assuming equal distribution on the luminal and abluminal surfaces. | | | | | |
| CD36_number_tum | CD36 receptor number on tumor cell | receptors/cell | 2500 |  | *Estimated according the qualitative data shown in Human Protein Atlas. |
| CD47_number_tum | CD47 receptor number on tumor cell | 10000 |
| LRP1_number_tum | LRP1 receptor number on tumor cell | 5000 |
| B1_number_tum | β1 integrin number on tumor cell | 10000 |
| CD36_number_disEC | CD36 receptor number on tumor endothelial cell | 1250 |
| CD47_number_disEC | CD47 receptor number on tumor endothelial cell | 5000 |
| LRP1_number_disEC | LRP1 receptor number on tumor endothelial cell | 2500 |
| B1_number_disEC | β1 integrin receptor number on tumor endothelial cell | 5000 |
| CD36_number_normEC | CD36 receptor number on normal endothelial cell | 1250 |
| CD47_number_normEC | CD47 receptor number on normal endothelial cell | 1250 |
| LRP1_number_normEC | LRP1 receptor number on normal endothelial cell | 625 |
| B1_number_normEC | β1 integrin receptor number on normal endothelial cell | 2500 |
| CD36_number_myo | CD36 receptor number on skeletal muscle fiber cell | 2500 |
| CD47_number_myo | CD47 receptor number on skeletal muscle fiber cell | 2500 |
| LRP1_number_myo | LRP1 receptor number on skeletal muscle fiber cell | 1250 |
| B1_number_myo | β1 integrin receptor number on skeletal muscle fiber cell | 5000 |
| R1_number_tum | VEGFR1 receptor number on tumor cell | 1100 | 15 | *VEGF receptor density followed our previous studies which uses the in vivo and in vitro measurements using quantitative flow cytometry. |
| R2_number_tum | VEGFR2 receptor number on tumor cell | 550 |
| N1_number_tum | Neuropilin-1 receptor number on tumor cell | 39500 |
| N2_number_tum | Neuropilin-2 receptor number on tumor cell | 39500 |
| R1_number_disEC | VEGFR1 receptor number on tumor endothelial cell | 3750 |
| R2_number_disEC | VEGFR2 receptor number on tumor endothelial cell | 300 |
| N1_number_disEC | Neuropilin-1 receptor number on tumor endothelial cell | 20000 |
| N2_number_disEC | Neuropilin-2 receptor number on tumor endothelial cell | 20000 |
| R1_number_normEC | VEGFR1 receptor number on normal endothelial cell | 550 |
| R2_number_normEC | VEGFR2 receptor number on normal endothelial cell | 350 |
| N1_number_normEC | Neuropilin-1 receptor number on tumor endothelial cell | 17000 |
| N2_number_normEC | Neuropilin-2 receptor number on tumor endothelial cell | 0 |
| R1_number_myo | VEGFR1 receptor number on skeletal muscle fiber cell | 0 |
| R2_number_myo | VEGFR2 receptor number on skeletal muscle fiber cell | 0 |
| N1_number_myo | Neuropilin-1 receptor number on skeletal muscle fiber cell | 34500 |
| N2_number_myo | Neuropilin-2 receptor number on skeletal muscle fiber cell | 0 |
| **Transportation Rates** | | | | | |
| The vascular permeability of VEGF uses the rates estimated in the first whole body model of VEGF basing on the size of molecule2. The lymphatic flow was introduced into the model in another work later43. | | | | | |
| k_lymph_dis | The transport rate through lymphatic flow from tumor to blood | cm3/s | 0 | 43 | *Assumed to be negligible. |
| k_lymph | The transport rate through lymphatic flow from normal tissue to blood | 0.0333333 |  |
| kperm_B_T_VEGF | Microvascular permeability to VEGF in the tumor | cm/s | 4.0e-7 | 2 |  |
| kperm_B_N_VEGF | Microvascular permeability to VEGF in the normal tissue | 4.0e-8 |  |
| kperm_B_T_aV | Microvascular permeability to Bevacizumab in the tumor | 3.0e-7 | *Assumed to be smaller than VEGF |
| kperm_B_N_aV | Microvascular permeability to Bevacizumab in the tumor | 3.0e-8 |
| **Properties of the Anti-angiogenic Drugs** | | | | | |
| The binding properties of VEGF are directly measured in an experimental study45. | | | | | |
| antiVEGF_dosage | Administration dosage of Bevacizumab | mg/kg | 10 |  |  |
| antiVEGF_MW | Molecular weight of Bevacizumab | Da | 150000 |  |  |
| infTime_antiVEGF | Infusion time of Bevacizumab | s | 5400 |  | * infusion in 1.5 hours. |
| Kd_V165_antiVEGF | The dissociation constant of Bevacizumab and VEGF165 | M | 2.2e-9 | 45 |  |
| Kd_V121_antiVEGF | The dissociation constant of Bevacizumab and VEGF121 | 2.2e-9 |  |
| koff_V165_antiVEGF | The binding of Bevacizumab and VEGF165 (koff) | s-1 | 2.0e-4 |  |
| koff_V121_antiVEGF | The binding of Bevacizumab and VEGF165 (koff) | 2.0e-4 |  |

* Here, M = moles/liter of interstitial fluid available to soluble species.

References:
1. Faeder JR, Blinov ML, Hlavacek WS. Rule-based modeling of biochemical systems with BioNetGen. *Methods Mol Biol*. 2009;500(1):113-167. doi:10.1007/978-1-59745-525-1_5.

2. Stefanini MO, Wu FTH, Mac Gabhann F, Popel AS. A compartment model of VEGF distribution in blood, healthy and diseased tissues. *BMC Syst Biol*. 2008;2:77. doi:10.1186/1752-0509-2-77.

3. Stefanini MO, Wu FTH, Mac Gabhann F, Popel AS. Increase of plasma VEGF after intravenous administration of bevacizumab is predicted by a pharmacokinetic model. *Cancer Res*. 2010;70(23):9886-9894. doi:10.1158/0008-5472.CAN-10-1419.

4. Bashkin P, Doctrow S, Klagsbrun M, Svahn CM, Folkman J, Vlodavsky I. Basic Fibroblast Growth Factor Binds to Subendothelial Extracellular Matrix and Is Released by Heparitinase and Heparin-like Molecules. *Biochemistry*. 1989;28(4):1737-1743. doi:10.1021/bi00430a047.

5. Dowd CJ, Cooney CL, Nugent MA. Heparan sulfate mediates bFGF transport through basement membrane by diffusion with rapid reversible binding. *J Biol Chem*. 1999;274(8):5236-5244. doi:10.1074/jbc.274.8.5236.

6. Finley SD, Popel AS. Effect of Tumor Microenvironment on Tumor VEGF During Anti-VEGF Treatment : Systems Biology Predictions. 2013;105(11). doi:10.1093/jnci/djt093.

7. Mac Gabhann F, Popel AS. Targeting neuropilin-1 to inhibit VEGF signaling in cancer: Comparison of therapeutic approaches. *PLoS Comput Biol*. 2006;2(12):1649-1662. doi:10.1371/journal.pcbi.0020180.

8. Gabhann FM, Popel AS. Interactions of VEGF isoforms with VEGFR-1, VEGFR-2, and neuropilin in vivo: a computational model of human skeletal muscle. *AJP Hear Circ Physiol*. 2006;292(1):H459-H474. doi:10.1152/ajpheart.00637.2006.

9. Byrne GJ, Hayden KE, Mcdowell G, Lang H, Kirwan CC. Angiogenic characteristics of circulating and tumoural thrombospondin-1 in breast cancer. 2007:1127-1132.

10. Baker EA, Leaper DJ, Hayter JP, Dickenson AJ. The matrix metalloproteinase system in oral squamous cell carcinoma. 2006;44:482-486. doi:10.1016/j.bjoms.2005.10.005.

11. Vasaturo F, Solai F, Malacrino C, et al. Plasma levels of matrix metalloproteinases 2 and 9 correlate with histological grade in breast cancer patients. *Oncol Lett*. 2012;5(1):316-320. doi:10.3892/ol.2012.977.

12. Hoier B, Passos M, Bangsbo J, Hellsten Y. Intense intermittent exercise provides weak stimulus for vascular endothelial growth factor secretion and capillary growth in skeletal muscle. *Exp Physiol*. 2013;98(2):585-597. doi:10.1113/expphysiol.2012.067967.

13. Finley SD, Angelikopoulos P, Koumoutsakos P, Popel AS. Pharmacokinetics of Anti-VEGF Agent aflibercept in cancer predicted by data-driven, molecular-detailed model. *CPT Pharmacometrics Syst Pharmacol*. 2015;4(11):641-649. doi:10.1002/psp4.12040.

14. Finley SD, Popel AS. Effect of tumor microenvironment on tumor VEGF during anti-VEGF treatment: Systems biology predictions. *J Natl Cancer Inst*. 2013;105(11):802-811. doi:10.1093/jnci/djt093.

15. Finley SD, Engel-Stefanini MO, Imoukhuede P, Popel AS. Pharmacokinetics and pharmacodynamics of VEGF-neutralizing antibodies. *BMC Syst Biol*. 2011;5(1):193. doi:10.1186/1752-0509-5-193.

16. Ljungberg B, Jacobsen J, Häggström-Rudolfssson S, Rasmuson T, Lindh G, Grankvist K. Tumour vascular endothelial growth factor (VEGF) mRNA in relation to serum VEGF protein levels and tumour progression in human renal cell carcinoma. *Urol Res*. 2003;31(5):335-340. doi:10.1007/s00240-003-0346-x.

17. Stimpfl M, Tong D, Fasching B, et al. Vascular endothelial growth factor splice variants and their prognostic value in breast and ovarian cancer. *Clin Cancer Res*. 2002;8(7):2253-2259.

18. Yuan A, Yu CJ, Luh KT, et al. Quantification of VEGF mRNA expression in non-small cell lung cancer using a real-time quantitative reverse transcription-PCR assay and a comparison with quantitative competitive reverse transcription-PCR. *Lab Invest*. 2000;80(11):1671-80. http://www.ncbi.nlm.nih.gov/htbin-post/Entrez/query?db=m&form=6&dopt=r&uid=11092527.

19. Zygalaki E, Tsaroucha EG, Kaklamanis L, Lianidou ES. Quantitative real-time reverse transcription-PCR study of the expression of vascular endothelial growth factor (VEGF) splice variants and VEGF receptors (VEGFR-1 and VEGFR-2) in non-small cell lung cancer. *Clin Chem*. 2007;53(8):1433-1439. doi:10.1373/clinchem.2007.086819.

20. Finley SD, Dhar M, Popel AS. Compartment Model Predicts VEGF Secretion and Investigates the Effects of VEGF Trap in Tumor-Bearing Mice. *Front Oncol*. 2013;3. doi:10.3389/fonc.2013.00196.

21. Ng YS, Rohan R, Sunday ME, Demello DE, D’Amore P a. Differential expression of VEGF isoforms in mouse during development and in the adult. *Dev Dyn*. 2001;220(2):112-121. doi:10.1002/1097-0177(2000)9999:9999<::AID-DVDY1093>3.0.CO;2-D.

22. Gustafsson T, Ameln H, Fischer H, Sundberg CJ, Timmons J a, Jansson E. VEGF-A splice variants and related receptor expression in human skeletal muscle following submaximal exercise. *J Appl Physiol*. 2005;98(6):2137-2146. doi:10.1152/japplphysiol.01402.2004.

23. Rohrs JA, Sulistio CD, Finley SD. Predictive model of thrombospondin-1 and vascular endothelial growth factor in breast tumor tissue. *Npj Syst Biol Appl*. 2016;2(August):16030. doi:10.1038/npjsba.2016.30.

24. Soker S, Takashima S, Miao HQ, Neufeld G, Klagsbrun M. Neuropilin-1 is expressed by endothelial and tumor cells as an isoform- specific receptor for vascular endothelial growth factor. *Cell*. 1998;92(6):735-745. doi:10.1016/S0092-8674(00)81402-6.

25. Soker S, Fidder H, Neufeld G, Klagsbrun M. Characterization of novel vascular endothelial growth factor (VEGF) receptors on tumor cells that bind VEGF165 via its exon 7-encoded domain. *J Biol Chem*. 1996;271(10):5761-5767. doi:10.1074/jbc.271.10.5761.

26. Gluzman-Poltorak Z, Cohen T, Herzog Y, Neufeld G. Neuropilin-2 and neuropilin-1 are receptors for the 165-amino acid form of vascular endothelial growth factor (VEGF) and of placenta growth factor-2, but only neuropilin-2 functions as a receptor for the 145-amino acid form of VEGF. *J Biol Chem*. 2000;275(24):18040-18045. doi:10.1074/jbc.M909259199.

27. Herzog B, Pellet-Many C, Britton G, Hartzoulakis B, Zachary IC. VEGF binding to NRP1 is essential for VEGF stimulation of endothelial cell migration, complex formation between NRP1 and VEGFR2, and signaling via FAK Tyr407 phosphorylation. *Mol Biol Cell*. 2011;22(15):2766-2776. doi:10.1091/mbc.E09-12-1061.

28. Parker MW, Xu P, Li X, Vander Kooi CW. Structural basis for selective vascular endothelial growth factor-A (VEGF-A) binding to neuropilin-1. *J Biol Chem*. 2012;287(14):11082-11089. doi:10.1074/jbc.M111.331140.

29. de Vries C, Escobedo JA, Ueno H, Houck K, Ferrara N, Williams LT. The fms-like tyrosine kinase, a receptor for vascular endothelial growth factor. *Science (80- )*. 1992;255(5047):989-991. doi:10.1126/science.1312256.

30. Cunningham SA, Tran TM, Arrate MP, Brock TA. Characterization of vascular endothelial cell growth factor interactions with the kinase insert domain-containing receptor tyrosine kinase. A real time kinetic study. *J Biol Chem*. 1999;274(26):18421-18427. doi:10.1074/jbc.274.26.18421.

31. Bikfalvi A, Sauzeau C, Moukadiri H, et al. Interaction of vasculotropin/vascular endothelial cell growth factor with human umbilical vein endothelial cells: Binding, internalization, degradation, and biological effects. *J Cell Physiol*. 1991;149(1):50-59. doi:10.1002/jcp.1041490108.

32. Cochran S, Li CP, Ferro V. A surface plasmon resonance-based solution affinity assay for heparan sulfate-binding proteins. *Glycoconj J*. 2009;26(5):577-587. doi:10.1007/s10719-008-9210-0.

33. Wijelath E, Namekata M, Murray J, et al. Multiple mechanisms for exogenous heparin modulation of vascular endothelial growth factor activity. *J Cell Biochem*. 2010;111(2):461-468. doi:10.1002/jcb.22727.

34. Zhao W, McCallum SA, Xiao Z, Zhang F, Linhardt RJ. Binding affinities of vascular endothelial growth factor (VEGF) for heparin-derived oligosaccharides. *Biosci Rep*. 2012;32(1):71-81. doi:10.1042/BSR20110077.

35. Bhattacharjee G, Asplin IR, Wu SM, Gawdi G, Pizzo S V. The conformation-dependent interaction of alpha 2-macroglobulin with vascular endothelial growth factor. A novel mechanism of alpha 2-macroglobulin/growth factor binding. *J Biol Chem*. 2000;275(35):26806-26811. doi:10.1074/jbc.M000156200.

36. Vempati P, Karagiannis ED, Popel AS. A biochemical model of matrix metalloproteinase 9 activation and inhibition. *J Biol Chem*. 2007;282(52):37585-37596. doi:10.1074/jbc.M611500200.

37. Vempati P, Mac Gabhann F, Popel AS. Quantifying the proteolytic release of extracellular matrix-sequestered VEGF with a computational model. *PLoS One*. 2010;5(7). doi:10.1371/journal.pone.0011860.

38. Gabhann F Mac, Popel AS. Differential binding of VEGF isoforms to VEGF receptor 2 in the presence of neuropilin-1: a computational model. *Am J Physiol Hear Circ Physiol*. 2005;288(6):H2851–H2860. doi:10.1152/ajpheart.01218.2004.

39. Whitaker GB, Limberg BJ, Rosenbaum JS. Vascular Endothelial Growth Factor Receptor-2 and Neuropilin-1 Form a Receptor Complex that is Responsible for the Differential Signaling Potency of VEGF165 and VEGF121. *J Biol Chem*. 2001;276(27):25520-25531. doi:10.1074/jbc.M102315200.

40. Bauer AL, Jackson TL, Jiang Y. A Cell-Based Model Exhibiting Branching and Anastomosis during Tumor-Induced Angiogenesis. *Biophys J*. 2007;92(9):3105-3121. doi:10.1529/biophysj.106.101501.

41. Hoekstra R, de Vos FYFL, Eskens FALM, et al. Phase I safety, pharmacokinetic, and pharmacodynamic study of the thrombospondin-1-mimetic angiogenesis inhibitor ABT-510 in patients with advanced cancer. *J Clin Oncol*. 2005;23(22):5188-5197. doi:10.1200/JCO.2005.05.013.

42. Kong L, Bhatt AR, Demny AB, et al. Pharmacokinetics of bevacizumab and its effects on serum vegf and igf-1 in infants with retinopathy of prematurity. *Investig Ophthalmol Vis Sci*. 2015;56(2):956-961. doi:10.1167/iovs.14-15842.

43. Stefanini MO, Wu FTH, Gabhann F Mac, Popel AS. The presence of VEGF receptors on the luminal surface of endothelial cells affects VEGF distribution and VEGF signaling. *PLoS Comput Biol*. 2009;5(12). doi:10.1371/journal.pcbi.1000622.

44. Imoukhuede PII, Popel AS. Quantification and cell-to-cell variation of vascular endothelial growth factor receptors. *Exp Cell Res*. 2011;317(7):955-965. doi:10.1016/j.yexcr.2010.12.014.

45. Liang WC, Wu X, Peale F V., et al. Cross-species vascular endothelial growth factor (VEGF)-blocking antibodies completely inhibit the growth of human tumor xenografts and measure the contribution of stromal VEGF. *J Biol Chem*. 2006;281(2):951-961. doi:10.1074/jbc.M508199200.
